# Supplementary material
Source: PubMed Central journal article supplement (PMC5820181)
Supplement: NIHMS936909-supplement-Supplementary_Information.pdf [file NIHMS936909-supplement-Supplementary_Information.pdf]

## SUPPORTING INFORMATION

### Designing Flavoprotein-GFP fusion Probes for Analyte-specific Ratiometric Fluorescence Imaging

Devin A. Hudson,<sup>†</sup> Jeffrey L. Caplan,<sup>§</sup> and Colin Thorpe<sup>\*†</sup>

<sup>†</sup>Department of Chemistry and Biochemistry, University of Delaware, Newark, DE 19716, United States.

<sup>§</sup>Bioimaging Center, Delaware Biotechnology Institute, Newark, Delaware 19716, United States

#### Table of Contents

|            |                                                                    |
|------------|--------------------------------------------------------------------|
| Page S2.   | DNA Sequences of TrxR-mCherry                                      |
| Page S3.   | Protein Sequence of TrxR-mCherry                                   |
| Page S3.   | DNA Sequences of LipDH-mCherry (Bacterial)                         |
| Page S4.   | Protein Sequences of LipDH-mCherry (Bacterial)                     |
| Page S4.   | DNA Sequence of TrxR <sub>GV</sub> -mRuby2                         |
| Page S5.   | Protein Sequence of TrxR <sub>GV</sub> -mRuby2                     |
| Page S5.   | DNA Sequences of LipDH-mCherry (Mammalian)                         |
| Page S6.   | Protein Sequences of LipDH-mCherry (Mammalian)                     |
| Figure S1. | Reduction of <i>Ec</i> Trx1 followed by tryptophan fluorescence.   |
| Figure S2. | Confocal field of view of thioredoxin sensor flow cell.            |
| Figure S3. | Confocal field of view of NAD <sup>+</sup> /NADH sensor flow cell. |

## DNA Sequences of TrxR-mCherry

GCTAGCATGACTGGTGGACAGCAAATGGGTTCGGGATCTGTACGACGATGACGATAAGGA  
TCCAACCCCTTATGGGCACGACCAAACACAGTAAACTGCTTATCCTGGGTTTCAGGCCCGGC  
GGGATACACCGCTGCTGTCTACGCGGCGCGCGCCAACCTGCAACCTGTGCTGATTACCGG  
CATGGAAAAAGGCGGCCAACTGACCACCACCACGGAAGTGGAAAACTGGCCTGGCGATC  
CAAACGATCTGACCGGTCCGTTATTAATGGAGCGCATGCACGAACATGCCACCAAGTTTG  
AAACTGAGATCATT TTTGATCATATCAACAAGGTGGATCTGCAAACCGTCCGTTCCGTCT  
GAATGGCGATAACGGCGAATACTTGGCAGCGCTGATTATTGCCACCGGAGCTTCTGC  
ACGCTATCTCGGCCTGCCCTCTGAAGAAGCCTTTAAAGGCCGTGGGGTTTCTGCTTGTGCA  
ACCTGCGACGGTTTCTTCTATCGCAACCAGAAAGTTGCGGTCATCGGCCGGCGGCAATACC  
GCGGTTGAAGAGGCGCTGTATCTGTCTAACATCGCTTCGGAAGTGCATCTGATTACCGC  
CGTGACGGTTTCCGCGCGGAAAAATCCTCATTAAGCGCCTGATGGATAAAGTGGAGAAC  
GGCAACATCATTCTGCACACCAACCGTACGCTGGAAGAAGTGACCGGCGATCAAATGGGT  
GTCACTGGCGTTCGTCTGCGCGATACGCAAACAGCGATAACATCGAGTCACTCGACGTT  
GCCGTCTGTTTGTGCTATCGGTCACAGCCC GAATACTGCGATTTTTCGAAGGGCAGCTGG  
AACTGGAAAACGGCTACATCAAAGTACAGTCGGGTATTCATGGTAATGCCACCCAGACCA  
GCATTCCTGGCGTCTTTGCCGCAGGCGACGTGATGGATCACATTTATCGCCAGGCCATTAC  
TTCGGCCGGTACAGGCTGCATGGCAGCACTTGATGCGGAACGCTACCTCGATGGTTTAGC  
TGACGCAAAGTGAGCAAGGGCGAAGAGGATAACATGGCCATCATCAAGGAGTTCATGC  
GCTTCAAGGTGCACATGGAGGGCTCCGTGAACGGCCACGAGTTCGAGATCGAGGGCGAG  
GGCGAGGGCCGCCCTACGAGGGCACCCAGACCGCCAAGCTGAAGGTGACCAAGGGTGG  
CCCCCTGCCCTTCGCCTGGGACATCCTGTCCCCTCAGTTCATGTACGGCTCCAAGGCCTAC  
GTGAAGCACCCCGCCGACATCCCCGACTACTTGAAGCTGTCCTTCCCCGAGGGCTTCAAG  
TGGGAGCGCGTGATGAACTTCGAGGACGGCGGCGTGGTGACCGTGACCCAGGACTCCTCC  
CTGCAGGACGGCGAGTTCATCTACAAGGTGAAGCTGCGCGGCACCAACTTCCCCTCCGAC  
GGCCCCGTAATGCAGAAGAAGACCATGGGCTGGGAGGCCTCCTCCGAGCGGATGTACCC  
CGAGGACGGCGCCCTGAAGGGCGAGATCAAGCAGAGGCTGAAGCTGAAGGACGGCGGCC  
ACTACGACGCTGAGGTCAAGACCACCTACAAGGCCAAGAAGCCCGTGCAGCTGCCCGGC  
GCCTACAACGTCAACATCAAGTTGGACATCACCTCCCACAACGAGGACTACACCATCGTG  
GAACAGTACGAACGCGCCGAGGGCCGCACTCCACCGGCGGCATGGACGAGCTGTACAA  
GTAAGCTT

## Primers for G154V Mutation of TrxR

G154V\_Fwd: GTC ATC GGC GGC GTC AAT ACC GCG GTT  
G154V\_Rev: AAC CGC GGT ATT GAC GCC GCC GAT GAC

## Protein Sequence of TrxR-mCherry

MTGGQQMGRDLYDDDDDKDPTLMGTTKHSKLLILGSGPAGYTAAVYAARANLQPVLITGME  
KGGQLTTTTEVENWPGDPNDLTGPLLMEERMHEHATKFETEIIFDHINKVDLQNRPFRLNGDN  
GEYTCDALIIATGASARYLGLPSEEAFFKGRGVSACATCDGFFYRNQKVAVIGGGNTAVEEALY  
LSNIASEVHLIHRRDGFRAEKILIKRLMDKVENGNILHTNRTLEEVTGDQMGVTVGRLRDTQ  
NSDNIESLDVAGLFVAIGHSPNTAIFEGQLELENGYIKVQSGIHGNATQTSIPGVFAAGDVMDH  
IYRQAITSAGTGCMAALDAERYLDGLADAKVSKGEEDNMAIIEFMRFKVHMEGSVNGHEFE  
IEGEGEGRPYEGTQTAKLKVTKGGPLPFAWDILSPQFMYGSKAYVKHPADIPDYLKLSFPEGF  
KWERVMNFDGGVVTVTQDSSLQDGEFIYKVKLRGTFNPSDGPVMQKKTMGWEASSERMY  
PEDGALKGEIKQRLKLDGGHYDAEVKTTYKAKKPVQLPGAYNVNIKLDITSHNEDYTIVEQ  
YERAEGRHSTGGMDELYK

## DNA Sequences of LipDH-mCherry (for bacterial expression)

CCATGGGTCACCATCACCATCATCATGAGAACCTTTACTTTCAAGGCACCATTAACAAAA  
GTCACGATGTAGTTATCATTGGCGGCGGTCTGCTGGATATGTTGCCGCAATTAAGCGG  
CCCAGTTAGGGTTAACACCGCTTGTGTGGAAAAACGTGGTAAACTGGGGGGTACATGTT  
TGAATGTTGGGTGCATTCCATCGAAAGCCTTACTGAATAATTCCCCTTGTTCACCAGAT  
GCACACAGAAGCGCAGAAACGTGGTATTGACGTGAACGGCGATATTAAGATTAACGTGG  
CAAACCTTTCAAAAAGCCAAAGATGATGCTGTCAAACAACCTTACGGGTGGTATTGAACTGT  
TATTCAAAAAGAACAAGGTAACCTATTATAAAGGAAACGGATCATTGAGGATGAAACC  
AAAATTCGTGTGACTCCGGTAGATGGACTGGAAGGTACCGTAAAAGAGGATCATATCTTA  
GACGTCAAAAATATCATCGTAGCAACAGGTAGCGAAGTGACCCCTTCCCTGGAATTGAA  
ATCGATGAAGAAAAATCGTGAGTAGTACCGGCGCCTTATCCCTGAAAGAAATCCCAAG  
CGCCTCACCATCATCGGTGGCGGAATTATCGGTCTGGAAATGGGCAGTGTATATAGCCGT  
TTAGGTTCTAAAGTTACGGTAGTCGAATTTCAACCGCAAATTGGCGCAAGCATGGATGGA  
GAGGTTGCAAAGCGACCCAAAAATTTCTGAAGAAACAGGGCCTTGACTTTAAACTGAGC  
ACAAAAGTAATTTTCGGCCAAACGCAATGACGATAAAAACGTAGTAGAAATTGTAGTTGA  
AGACACTAAAACGAACAAACAGGAAAATCTCGAAGCGGAAGTACTTCTGGTTGCGGTCG  
GTCGCGCCCGTACATTGCGGGTTTGGGTGCAGAGAAGATCGGCCTCGAAGTGGACAAAC  
GCGGACGTCTGGTTATCGACGATCAGTTTAATTCTAAATTCACACATATCAAGGTGGTTGG  
TGACGTTACCTTCGGCCCTATGTTGGCGCACAAAGCAGAAGAAGAGGGTATTGCGGCTGT  
TGAAATGCTGAAAACAGGACACGGTCATGTAAATTACAATAATATTCCGAGTGTAATGTA  
TTCGCACCCCGAAGTGGCGTGGGTTCGGCAAACCGAAGAACAATTAAGGAGGCAGGGA  
TTGATTATAAAATTGGGAAATTTCCCTTTGCAGCAAATTCGCGCGCAAAAACCAACCAAG  
ATACCGAAGGTTTCGTGAAAATTTAATCGACAGTAAAACCGAACGCATTCTGGGAGCTC  
ATATTATTGGCCCGAACGCGGGTGAGATGATTGCGGAAGCAGGTTTGGCTTTAGAATATG  
GCGCTTCAGCTGAAGATGTGGCTCGTGTCTGTCATGCCCATCCAACATTGAGTGAAGCCTT  
TAAAGAAGCGAATATGGCAGCGTACGATAAAGCCATCCATTGTGTGAGCAAGGGCGAAG  
AGGATAACATGGCCATCATCAAGGAGTTCATGCGCTTCAAGGTGCACATGGAGGGCTCCG  
TGAACGGCCACGAGTTCGAGATCGAGGGCGAGGGCGAGGGCCGCCCTACGAGGGCACCC  
CAGACCGCCAAGCTGAAGGTGACCAAGGGTGGCCCCCTGCCCTTCGCCTGGGACATCCTG  
TCCCCTCAGTTCATGTACGGCTCCAAGGCCTACGTGAAGCACCCCGCCGACATCCCCGAC  
TACTTGAAGCTGTCTTCCCCGAGGGCTTCAAGTGGGAGCGCGTGATGAACTTCGAGGAC  
GGCGGCGTGGTGACCGTGACCCAGGACTCCTCCCTGCAGGACGGCGAGTTCATCTACAAG  
GTGAAGCTGCGCGGCACCAACTTCCCCTCCGACGGCCCCGTAATGCAGAAGAAGACAATG

GGCTGGGAGGCCTCCTCCGAGCGGATGTACCCCGAGGACGGCGCCCTGAAGGGCGAGAT  
CAAGCAGAGGCTGAAGCTGAAGGACGGCGGCCACTACGACGCTGAGGTCAAGACCACCT  
ACAAGGCCAAGAAGCCCGTGCAGCTGCCCGGCGCCTACAACGTCAACATCAAGTTGGAC  
ATCACCTCCCACAACGAGGACTACACCATCGTGGAACAGTACGAACGCGCCGAGGGCCG  
CCACTCCACCGGCGGCATGGACGAGCTGTACAAGTAAGCTT

### **Protein Sequences of LipDH-mCherry (for bacterial expression)**

MGHHHHHHENLYFQGTINKSHDVVIIGGGPAGYVAAIKAAQLGFNTACVEKRGKLGGTCLN  
VGCIPSKALLNNSHLFHQMHTEAQKRVIDVNGDIKINVANFQKAKDDAVKQLTGGIELLFKK  
NKVTYYKGNFSFEDETKIRVTPVDGLEGTVKEDHILDVKNIIVATGSEVTPFPGIEIDEEKIVSS  
TGALSLKEIPKRLTIIGGGIIGLEMGSVYSRLGSKVTVVEFQPQIGASMDGEVAKATQKFLKKQ  
GLDFKLSTKVISAKRNDDKNVVEIVVEDTKTNKQENLEAEVLLVAVGRRPYIAGLGAEKIGLE  
VDKRGRLVIDDQFNSKFPPIKVVGDVTFGPMLAHKAE EEGIAAVEMLKTGHGHVNYNNIPSV  
MYSHPEVAWVGKTEEQLKEAGIDYKIGKFPFAANSRAKTNQDTEGFVKILIDSKTERILGAHII  
GPNAGEMIAEAGLALEYGASAEDVARVCHAHPTLSEAFKEANMAAYDKAIHCVSKGEEDNM  
AIIKEFMRFKVHMEGSVNGHEFEIEGEGEGRPYEGTQTAKLKVTKGGPLPAWDILSPQFMYG  
SKAYVKHPADIPDYLKLSFPEGFKWERVMNFEDGGVVTVTQDSSLQDGEFIYKVKLRGTNFP  
SDGPVMQKKTMGWEASSERMYPEDGALKGEIKQRLKLDGGHYDAEVKTTYKAKKPVQLP  
GAYNVNIKLDITSHNEDYTIVEQYERAEGRHSTGGMDELYK

### **DNA Sequence of TrxR<sub>Gv</sub>-mRuby2**

TCTAGAAATAATTTTGTTTAACTTTAAGAAGGAGATATAATGACTGGTGGACAGCAAATG  
GGTCGGGATCTGTACGACGATGACGATAAGGATCCAACCCTTATGGGCACGACCAAACAC  
AGTAAACTGCTTATCCTGGGTTTCAGGCCCGGCGGGATAACCCGCTGCTGTCTACGCGGCG  
CGCGCCAACCTGCAACCTGTGCTGATTACCGGCATGGAAAAAGGCGGCCAACTGACCACC  
ACCACGGAAGTGGAAAACCTGGCCTGGCGATCCAAACGATCTGACCGGTCCGTTATTAATG  
GAGCGCATGCACGAACATGCCACCAAGTTTGAAACTGAGATCATTTTTGATCATATCAAC  
AAGGTGGATCTGCAAAACCGTCCGTTCCGTCTGAATGGCGATAACGGCGAATAACTTGC  
GACGCGCTGATTATTGCCACCGGAGCTTCTGCACGCTATCTCGGCCTGCCCTCTGAAGAA  
GCCTTTAAAGGCCGTGGGGTTTCTGCTTGCAACCTGCGACGGTTTCTTCTATCGCAACC  
AGAAAGTTGCGGTCATCGGCGGCGTGAATAACCGCGGTTGAAGAGGCGCTGTATCTGTCTA  
ACATCGCTTCGGAAGTGCATCTGATTACCGCCGTGACGGTTTCCGCGCGGAAAAAATCC  
TCATTAAGCGCCTGATGGATAAAGTGGAGAACGGCAACATCATTCTGCACACCAACCGTA  
CGCTGGAAGAAGTGACCGGCGATCAAATGGGTGTCACTGGCGTTCGTCTGCGCGATACGC  
AAAACAGCGATAACATCGAGTCACTCGACGTTGCCGGTCTGTTTGTGCTATCGGTCACA  
GCCCCAATACTGCGATTTTTCGAAGGGCAGCTGGAACCTGGAAAACGGCTACATCAAAGTAC  
AGTCGGGTATTCATGGTAATGCCACCCAGACCAGCATTCTGCGGTCTTTGCCGCGAGGCG  
ACGTGATGGATCACATTTATCGCCAGGCCATTACTTCGGCCGGTACAGGCTGCATGGCAG  
CACTTGATGCGGAACGCTACCTCGATGGTTTAGCTGACGCAAAGTCAGCAAAGGCGAGG  
AACTGATTAAGAGAATATGCGCATGAAAGTAGTGATGGAAGGCAGTGTTAATGGGCAT  
CAGTTTAAAGTCACTGGTGAGGGAGAGGGTAACCCGTATATGGGTACGCAGACCATGCGT  
ATCAAAGTTATTGAGGGTGGTCCGCTTCCTTTCGCGTTTGATATCCTTGCTACCTCCTTTAT  
GTATGGCTCTCGCACGTTTATTAATATCCGAAAGGAATTCCTGATTTTTTTTAAACAATCA  
TTCCGGAAGGCTTTACATGGGAACGTGTTACGCGTTATGAAGACGGCGGCGTCTGTTACT

GTCATGCAAGATACCTCACTGGAAGATGGCTGCCTGGTCTATCACGTCCAGGTTTCGTGGA  
GTTAATTTTCCGTCAAATGGTCCTGTGATGCAGAAAAAGACAAAGGGTTGGGAACCGAAC  
ACGGAAATGATGTATCCGGCGGATGGGGGTCTGCGCGGCTACACACATATGGCTCTTAAA  
GTTGATGGTGGCGGGCATCTGTCTTGCAGCTTCGTGACGACCTATCGCAGCAAAAAACG  
GTGGGGAACATCAAAATGCCTGGCATTTCATGCTGTCGACCACCGCCTGGAACGTCTGGAA  
GAATCCGACAATGAAATGTTTGTGGTGCAGCGTGAACACGCGGTGGCGAAATTCGCTGGC  
CTGGGTGGCGGTATGGACGAGCTCTATAAAGGGAGCGGCCATCACCATCACCATCACTAA  
CCATGG

### **Protein Sequence of TrxR<sub>Gv</sub>-mRuby2**

MTGGQQMGRDLYDDDDKDPTLMGTTKHSKLLILGSGPAGYTA AVYAARANLQPVLITGME  
KGGQLTTTTEVENWPGDPNDLTGPLLMERMHEHATKFETEIIIFDHINKVDLQNRPFRLNGDN  
GEYTCDALIIATGASARYLGLPSEEFKGRGVSACATCDGFFYRNQKVA VIGGVNTAVEEALY  
LSNIASEVHLIHRRDGFRAEKILIKRLMDKVENGNILHTNRTLEEVTGDQMGVTGVRLRDTQ  
NSDNIESLDVAGLFVAIGHSPNTAIFEGQLELENGYIKVQSGIHGNATQTSIPGVFAAGDVM DH  
IYRQAITSAGTGCMAALDAERYLDGLADAKVSKGEELIKENMRMKVVMEGSVNGHQFKCTG  
EGEGNPYMGQTMRIKVIEGGPLPFAFDILATSFMYGSRTFIKYPKGIPDFFKQSFPEGFTWERV  
TRYEDGGVVTVMQDTSLEDGCLVYHVQVRGVNFPSNGPVMQKKTGWEPNTEMMYPADG  
GLRGYTHMALKVDGGGHLSCSFVTTYRSKKT VGNIKMPGIHAVDHRLERLEESDNEMFVVQ  
REHAVAKFAGLGGGMDEL YKGSQH HHHHHH

### **DNA Sequence of LipDH-mCherry (for mammalian expression)**

GGATCCCACAATTAACAAGTCCCATGACGTGGTCATCATCGGAGGCGGACCTGCCGGCTA  
CGTCGCCGCTATCAAGGCCGCCAGCTGGGCTTTAATACCGCTTGCGTGGAGAAGAGAGG  
CAAGCTGGGCGGCACATGCCTGAATGTGGGATGTATCCCTTCCAAGGCCCTGCTGAACAA  
TTCCCACCTGTTCCACCAAATGCACACCGAGGCCCAAAAAAGGGGCATCGATGTGAACGG  
CGACATCAAGATCAACGTCGCCAATTTTCAGAAGGCCAAAGACGACCGCGTGAACACAGC  
TCACAGGCGGCATTGAGCTGCTCTTTAAGAAGAATAAAGTGACCTACTACAAGGGCAACG  
GCTCCTTCGAGGATGAGACCAAGATTAGAGTGACCCCTGTGGACGGCCTCGAAGGCACCG  
TCAAAGAGGACCATATTCTGGACGTGAAAAACATCATTGTGGCCACCGGCTCCGAGGTCA  
CCCCCTTCCCCGGCATTGAGATCGATGAAGAGAAGATTGTGTCCAGCACCGGCGCCCTGT  
CCCTGAAGGAGATCCCCAAAAGACTACCATCATCGGAGGCGGCATCATCGGCTTAGAAA  
TGGGCAGCGTCTATAGCAGGCTGGGCTCCAAGGTGACCGTCGTCGAGTTCAGCCTCAA  
TCGGAGCCAGCATGGACGGCGAAGTGGCCAAAGCCACCCAGAAGTTCCTGAAGAAGCAA  
GGCCTCGACTTCAA ACTGTCCACCAAGGTGATCAGCGCTAAAAGGAACGACGACAAAAA  
CGTGGTGGAGATCGTGGTCGAGGACACAAAGACCAACAAGCAGGAGAATCTGGAAGCCG  
AAGTGCTCCTGGTGCCTGGGCGAAGGCCTTACATTGCCGGACTGGGCGCCGAAAAGA  
TCGGACTGGAAGTGGACAAGAGGGGCAGGCTCGTGATCGATGACCAGTTCAACTCCAAG  
TTCCCCACATCAAGGTCTGTTGGGAGACGTGACCTTTGGCCCCATGCTGGCCCAAGGCC  
GAAGAAGAGGGAATTGCCGCCGTCGAAATGCTGAAGACAGGCCACGGCCATGTGAACTA  
CAACAATATCCCCAGCGTGATGTACTCCCATCCTGAGGTCGCTTGGGTTCGGCAAAACAGA  
GGAGCAGCTCAAAGAGGCCCGGCATTGACTACAAGATCGGCAAGTTCCTTCGCGCCAA  
CAGCAGAGCCAAGACAAATCAGGACACCGAGGGCTTCGTGAAGATTCTGATCGACAGCA  
AGACAGAGAGAATCCTGGGCGCTCACATCATCGGCCCTAATGCCGGCGAGATGATTGCCG

AGGCTGGACTGGCCCTCGAATACGGCGCCAGCGCTGAGGATGTGGCTAGGGTCTGTACG  
CCCATCCCACCCTCTCCGAGGCCTTCAAGGAGGCTAACATGGCCGCCTACGACAAGGCTA  
TCCACTGTGTGTCAAAAGGGGAAGAAGACAACATGGCTATCATAAAAGAATTTATGCGGT  
TCAAAGTTCACATGGAAGGGTCCGTTAATGGTCATGAGTTCGAGATTGAGGGCGAAGGAG  
AGGGCAGACCGTACGAAGGAACACAGACGGCAAACTGAAGGTCACCAAGGGCGGTCCG  
CTGCCTTTCGCGTGGGATATACTGTCACCCCAGTTTATGTACGGAAGCAAAGCGTATGTCA  
AGCACCCGGCGGACATCCCAGATTATCTCAAACCTGTCCCTTCCCCGAAGGTTTCAAATGGG  
AAAGGGTAATGAACTTCGAGGATGGTGGAGTCGTCACAGTTACACAAGATTCTTCTCTTC  
AGGACGGCGAGTTTATCTACAAGGTCAAACCTGAGGGGCACCAACTTCCCTTCTGACGGAC  
CCGTAATGCAAAAAAAGACGATGGGGTGGGAGGCTTCATCAGAGCGCATGTACCCAGAG  
GATGGGGCTCTGAAGGGCGAGATCAAGCAGCGGCTGAAGCTGAAAGACGGAGGACACTA  
CGACGCGGAAGTGAAAACCTTACAAAAGCAAAAAAGCCGGTACAACTCCCAGGGGCAT  
ATAATGTAAACATCAAACCTGGACATTACGAGCCACAATGAGGACTACACGATAGTCGAA  
CAGTACGAACGGGCGGAAGGAAGACACTCTACAGGTGGGATGGACGAACTCTATAAGTG  
ACTCGAG

### **Protein Sequences of LipDH-mCherry (for mammalian expression)**

MDYKDDDDKARADPTINKSHDVVIIGGGPAGYVAAIKAAQLGFNTACVEKRGKLGGTCLNV  
GCIPSKALLNNSHLFHQMHTAQKRGIDVNGDIKINVANFQKAKDDAVKQLTGGIELLFKKN  
KVTTYKGNFSFEDETKIRVTPVDGLEGTVKEDHILDVKNIIIVATGSEVTPFPGIEIDEEKIVSST  
GALSLKEIPKRLTIIGGGIIGLEMGSVYSRLGSKVTVVEFQPQIGASMDGEVAKATQKFLKKQG  
LDFKLSTKVISAKRNDDKNVVEIVVEDTKTNKQENLEAEVLLVAVGRRPYIAGLGAEKIGLEV  
DKRGRLVIDDQFNSKFPHIKVVGDVTFGPMLAHKAE EEGIAAVEMLKTGHGHVNYNNIPSVM  
YSHPEVAWVGKTEEQLKEAGIDYKIGKFPFAANSRAKTNQDTEGFVKILIDSKTERILGAHIIGP  
NAGEMIAEAGLAL EYGASAEDVARVCHAHPTLSEAFKEANMAAYDKAIHCVSKGEEDNMAII  
KEFMRFKVHMEGSVNGHEFEIEGEGEGRPYEGTQTAKLKVTKGGPLPFAWDILSPQFMYGSK  
AYVKHPADIPDYLKLSFPEGFKWERVMNFEDGGVVTVTQDSSLQDGEFIYKVKLRGTNFPD  
GPVMQKKTMGWEASSERMYPEDGALKGEIKQRLKLDGGHYDAEVKTTYKAKKPVQLPGA  
YNVNIKLDITSHNEDYTIVEQYERAEGRHSTGGMDELYK

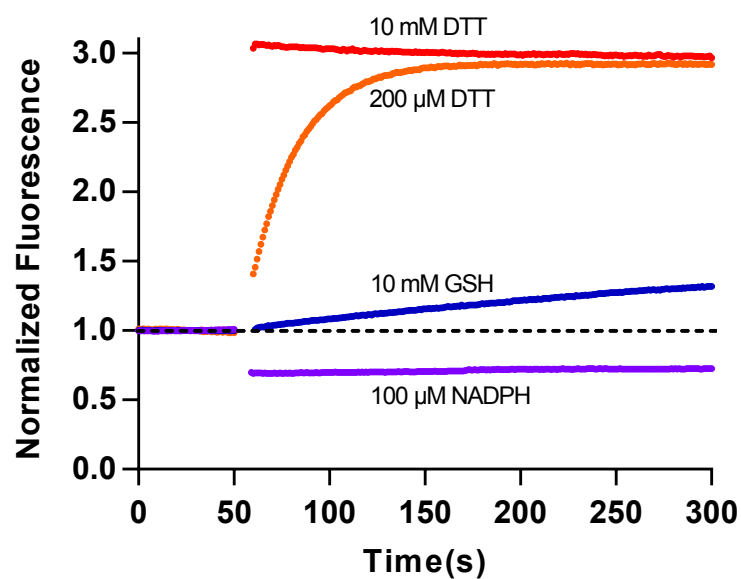

**Figure S1.** Reduction of *EcTrx1* followed by tryptophan fluorescence. Solutions of 5  $\mu\text{M}$  Trx1 (in 200  $\mu\text{L}$  of 50 mM phosphate buffer, pH 7.5, 25  $^{\circ}\text{C}$ ) were monitored by fluorescence (excitation 290 nm with emission at 350 nm). Potential reductants (100  $\mu\text{M}$  NADPH, 10 mM GSH, 200  $\mu\text{M}$  or 10 mM DTT) were added at 50 s. The lines represent an average of 3 experiments normalized relative to unit initial fluorescence.

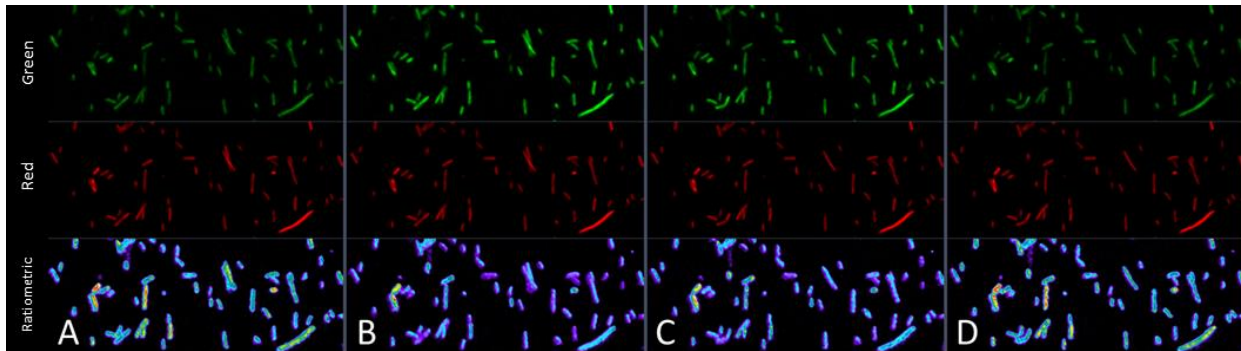

**Figure S2.** Confocal field of view of *E. coli* cells expressing TrxR<sub>GV</sub>-mCherry sensor. Cells were allowed to adhere to the base of poly-L-lysine treated ibidi flow cells. The wells were serially infused with M9 media containing 5 mM DTT, 5 mM diamide, medium alone, and finally 5 mM DTT (Panels A-D, respectively).



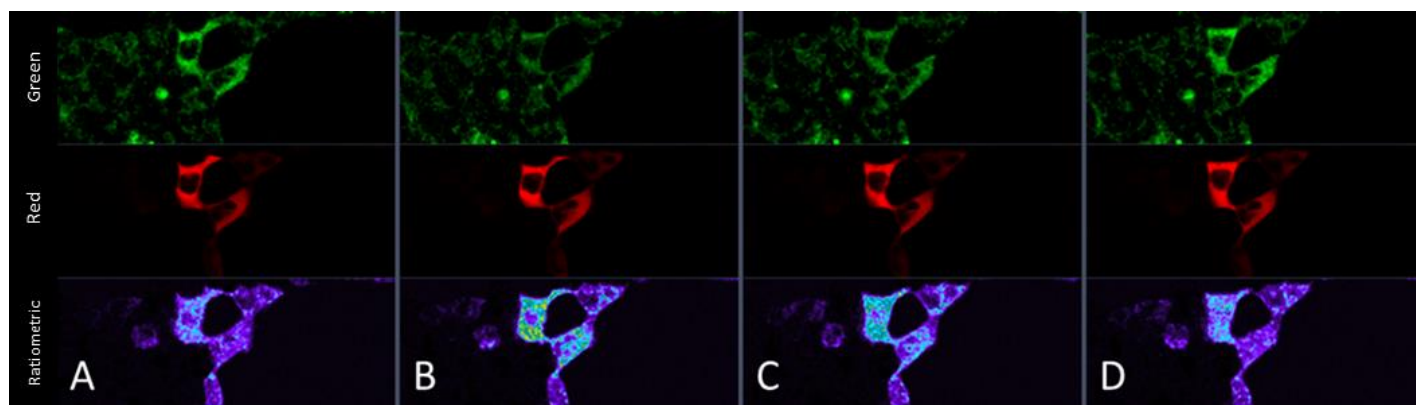

**Figure S3.** Confocal field of view for one of the  $\text{NAD}^+/\text{NADH}$  sensor flow cell experiments. HEK293T cells over-expressing LipDH-mCherry are attached to the bottom face of an ibidi flow cells. Solutions flowing over the cells were as described in the Text. Panel A-D contain, respectively, 10 mM pyruvate, 10 mM lactate, media alone, and 10 mM pyruvate.
